# Supplementary material
Source: Research Square preprint supplement (doi:10.21203/rs.3.rs-9924119/v1)

Fig.2E

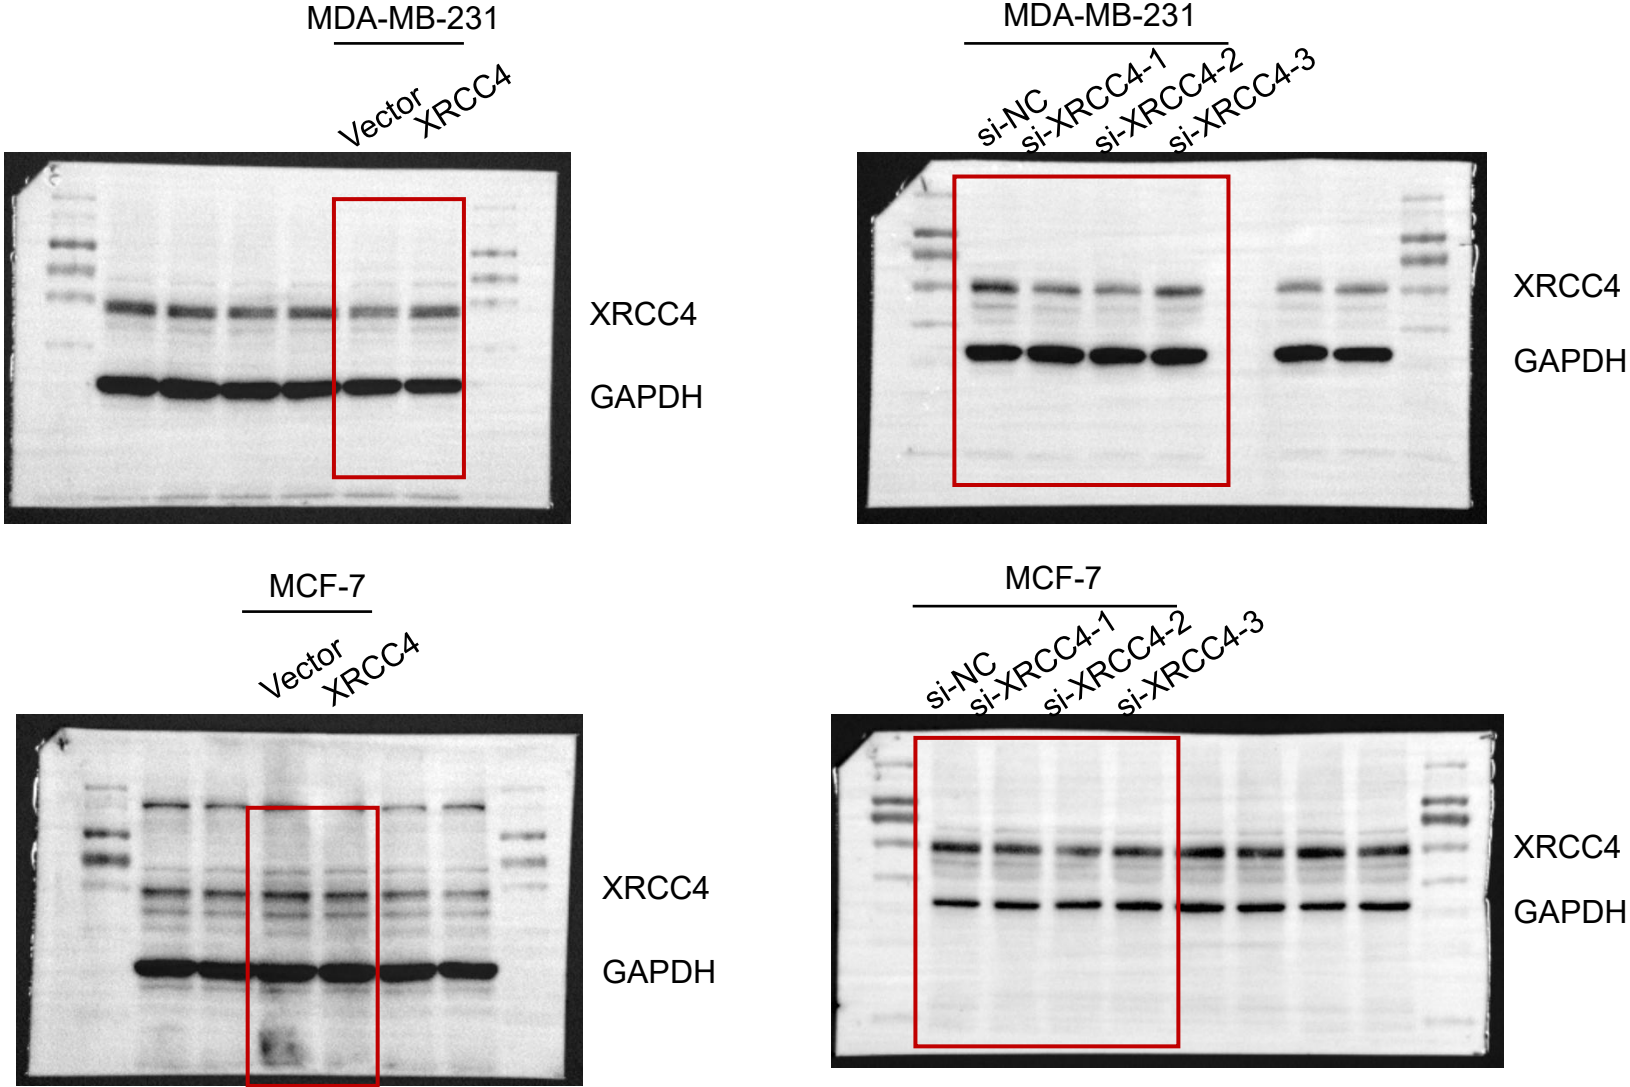

Fig.2N

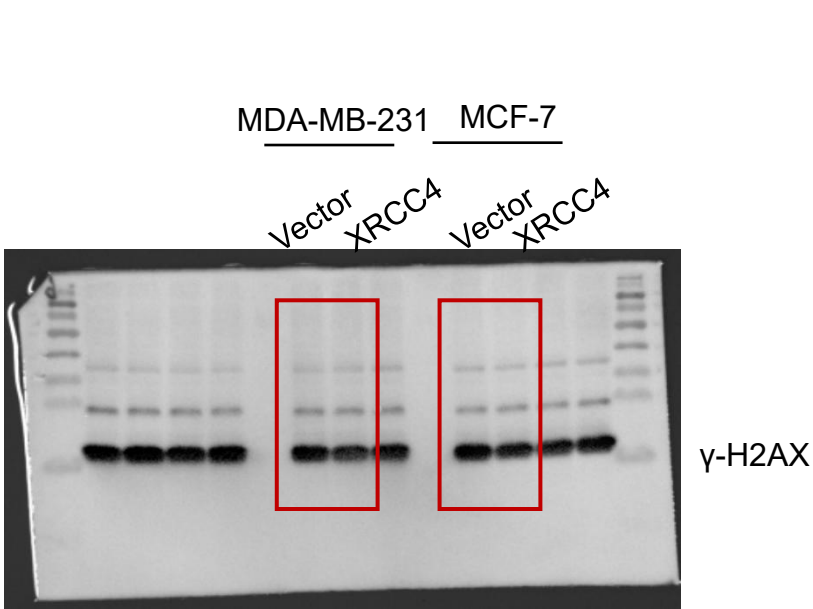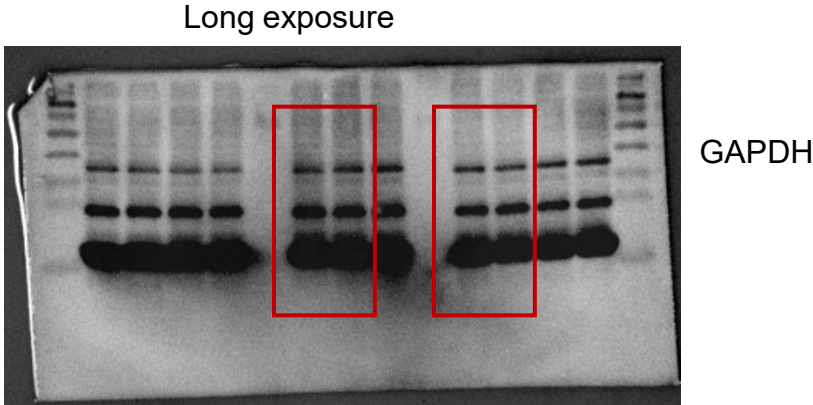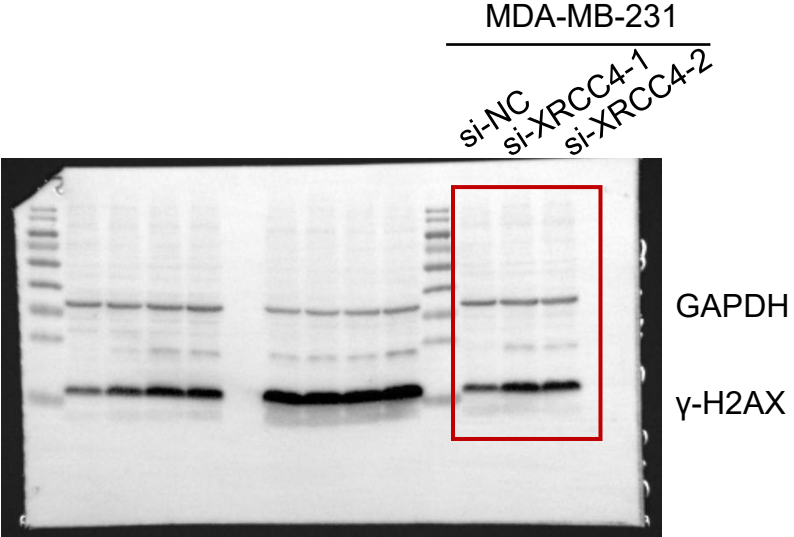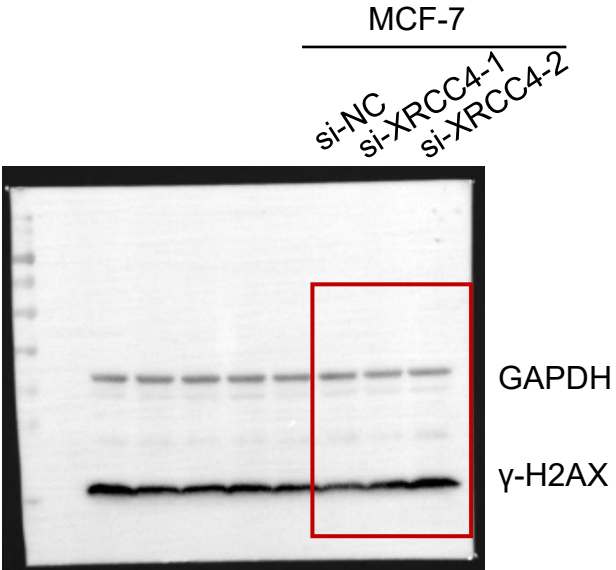

Fig.3B

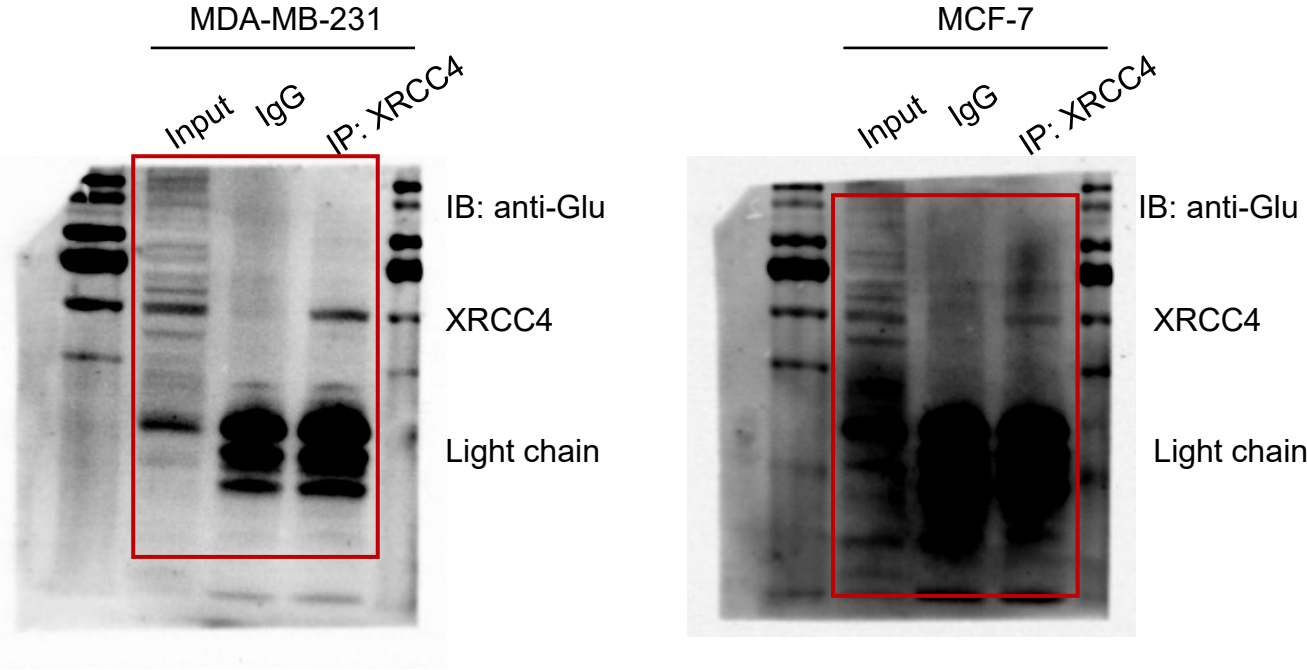

Fig.3D

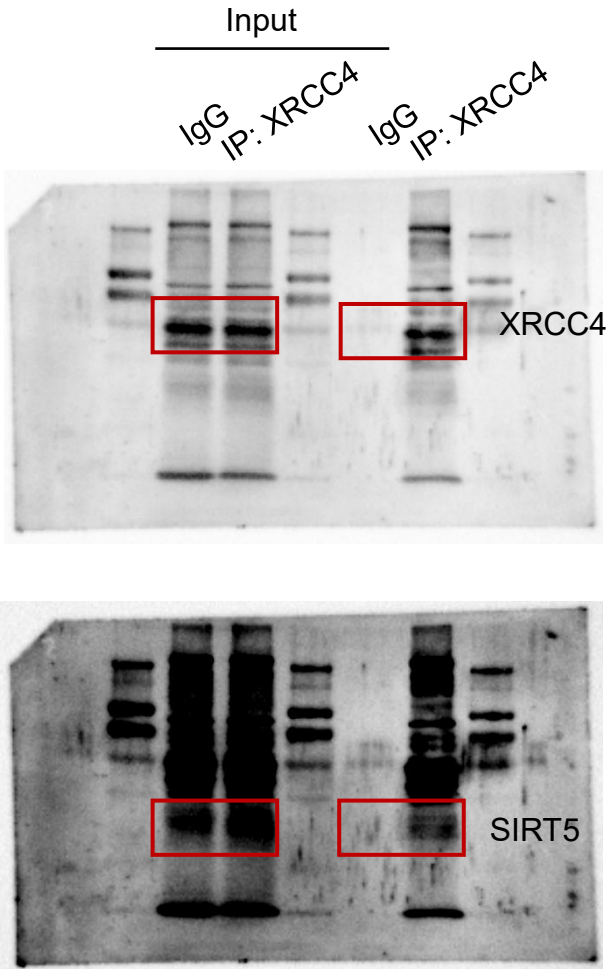

Fig.3F

MDA-MB-231

MCF-7

MDA-MB-231

MCF-7

Vector SIRT5

Vector SIRT5

si-NC si-SIRT5

si-NC si-SIRT5

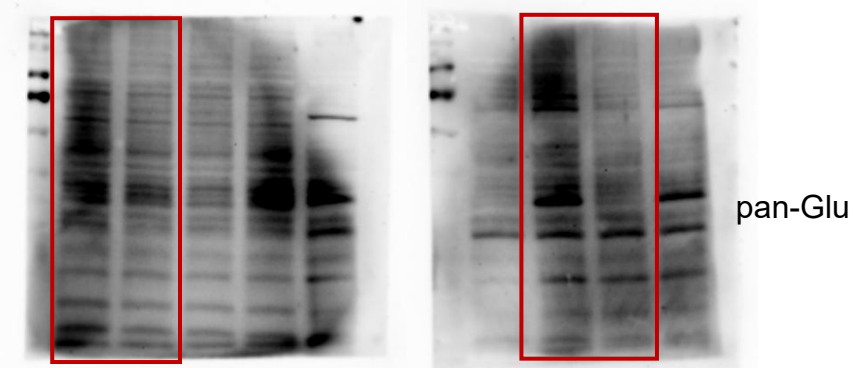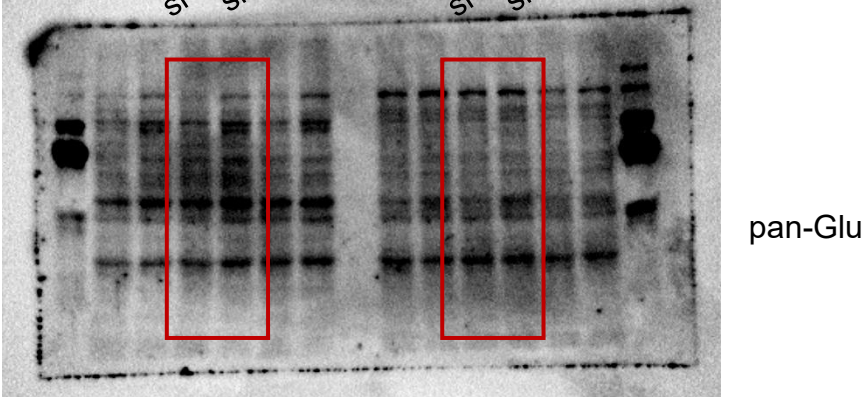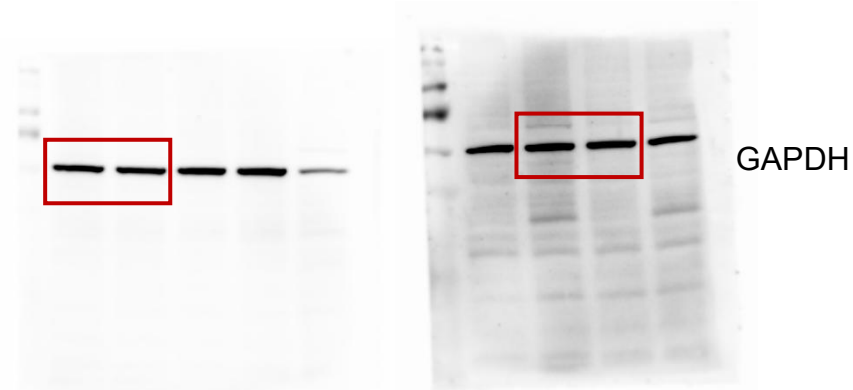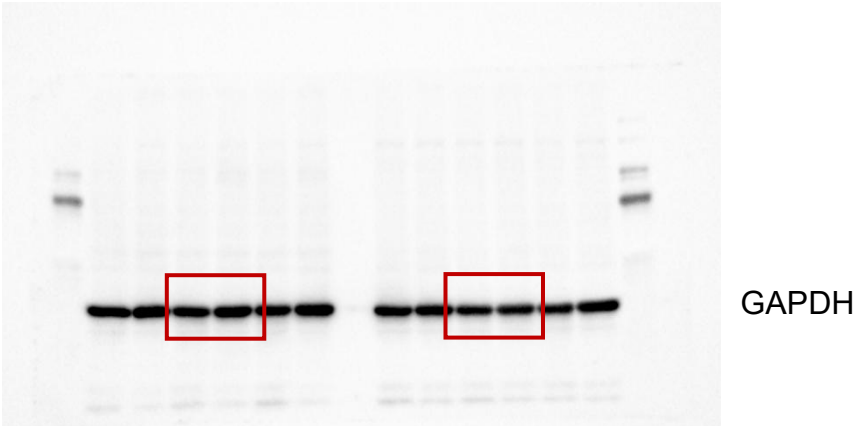

Fig.3F

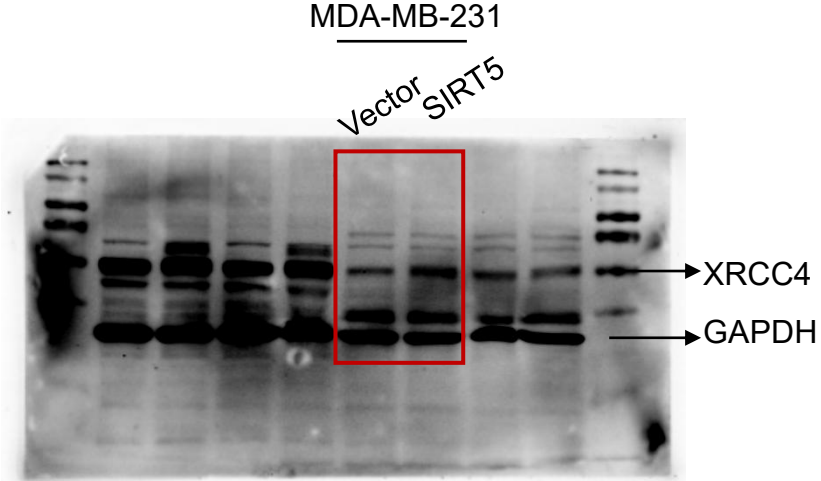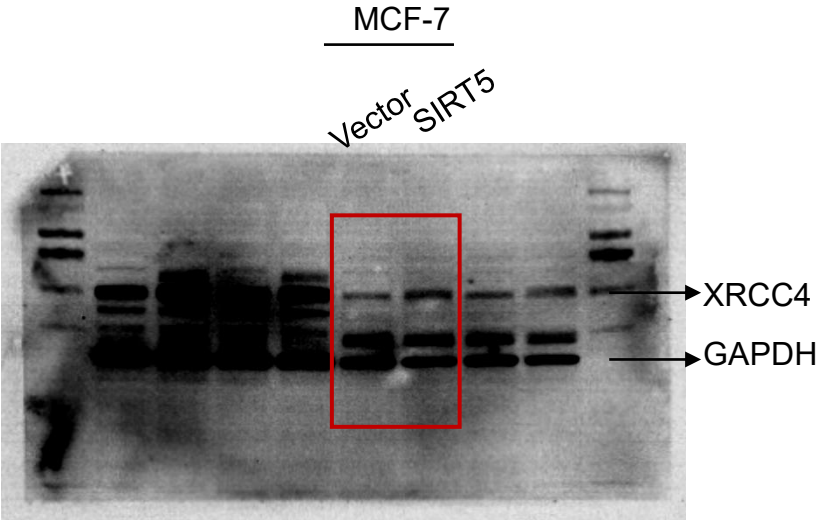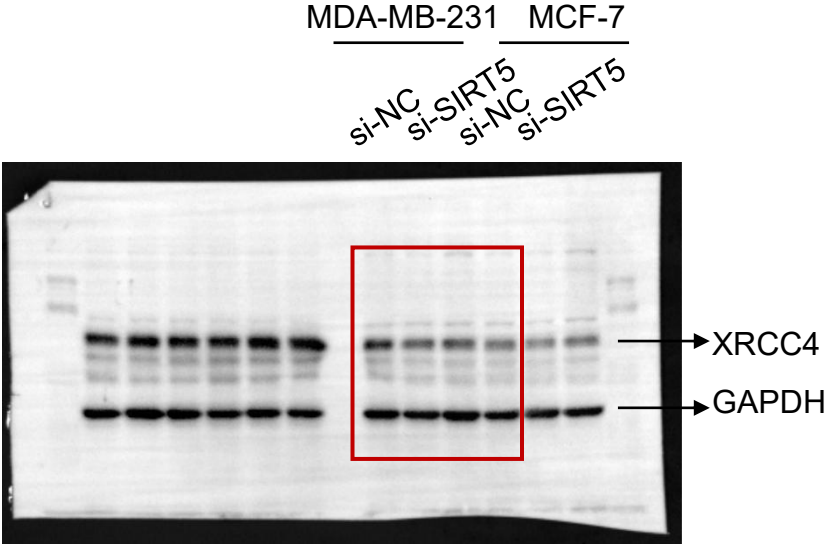

Fig.3F

MDA-MB-231

Vector SIRT5

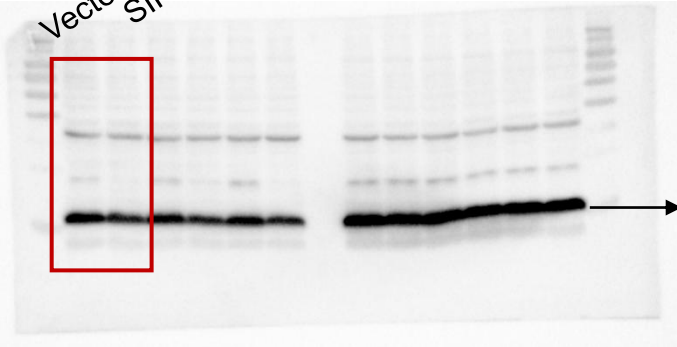

Long exposure

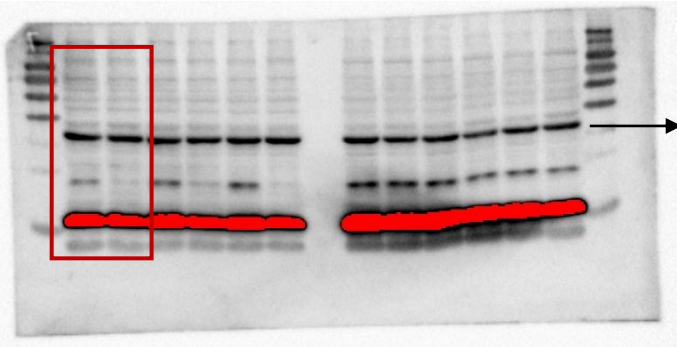

MCF-7

Vector SIRT5

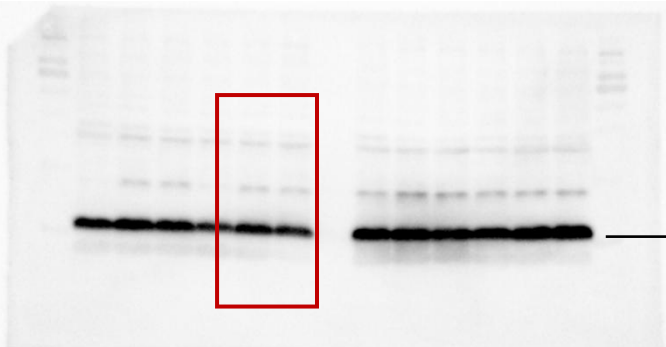

Long exposure

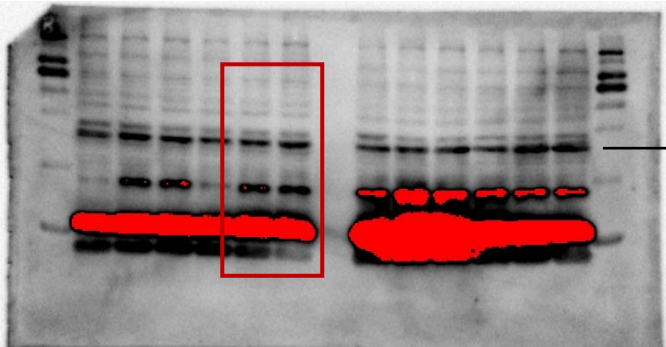

MDA-MB-231

MCF-7

Vector SIRT5

Vector SIRT5

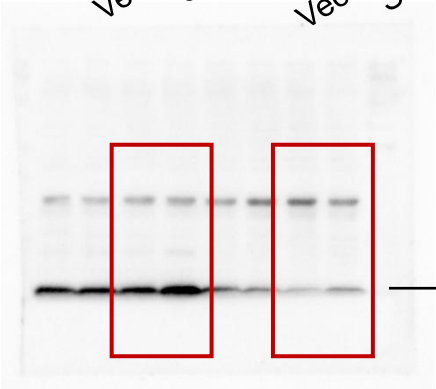

Long exposure

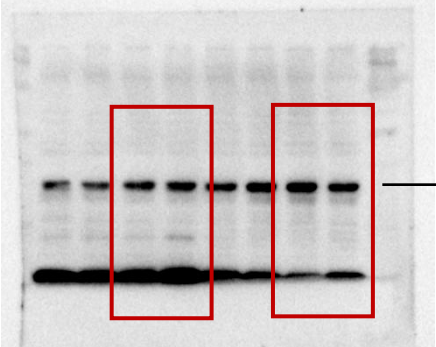

Fig.5D

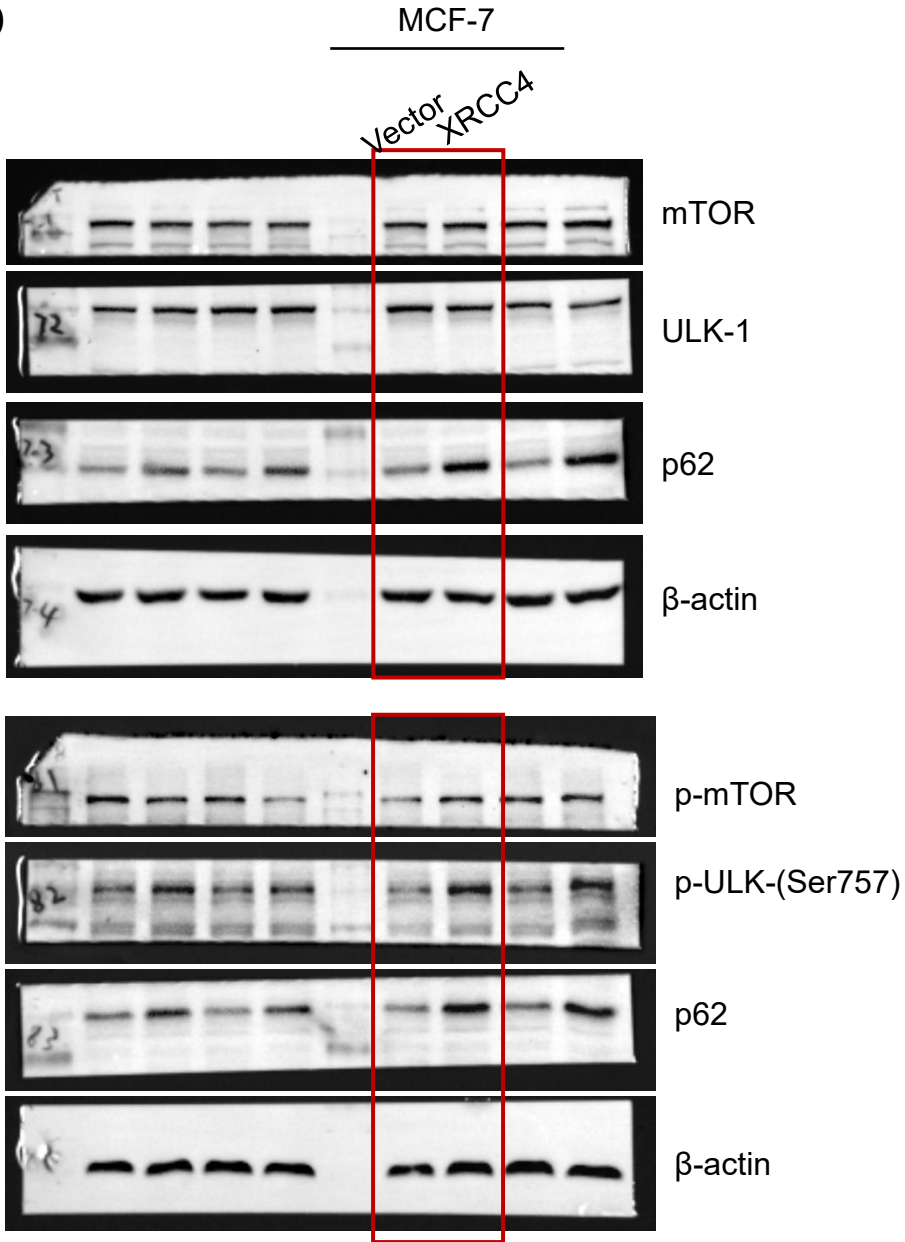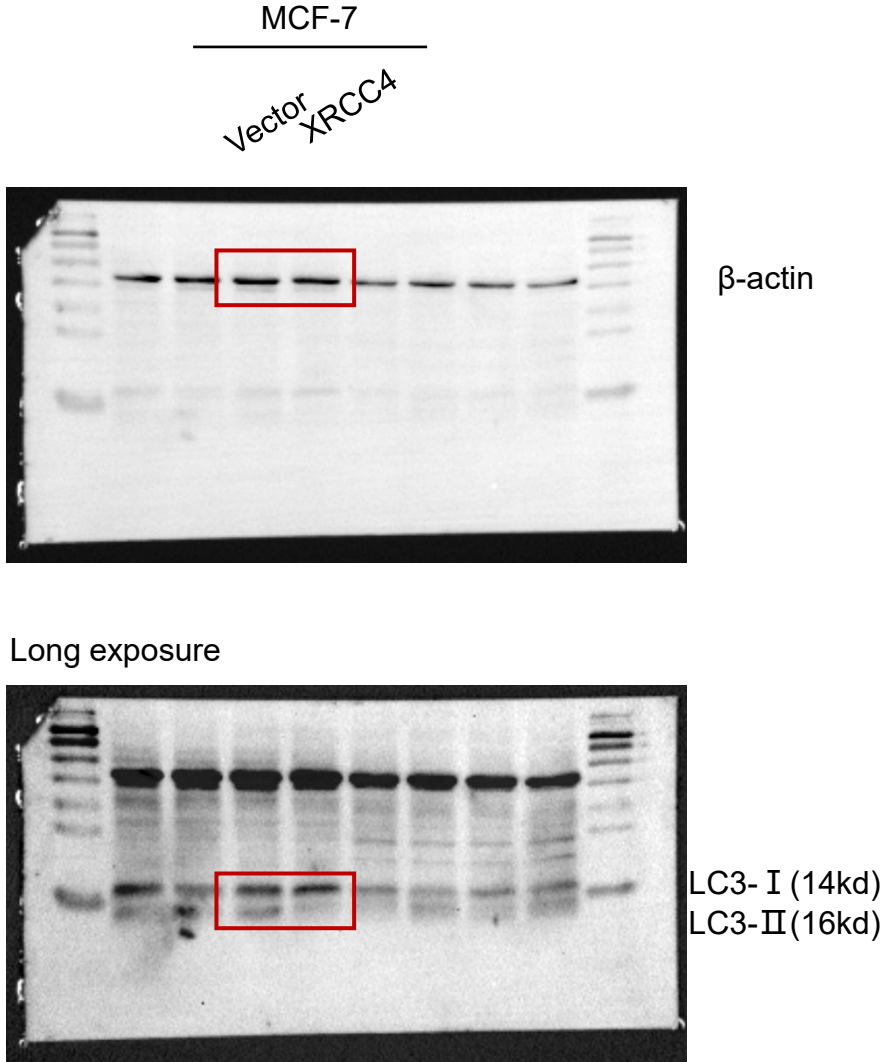

Fig.5D

MDA-MB-231

si-NC  
si-XRCCA-1  
si-XRCCA-2

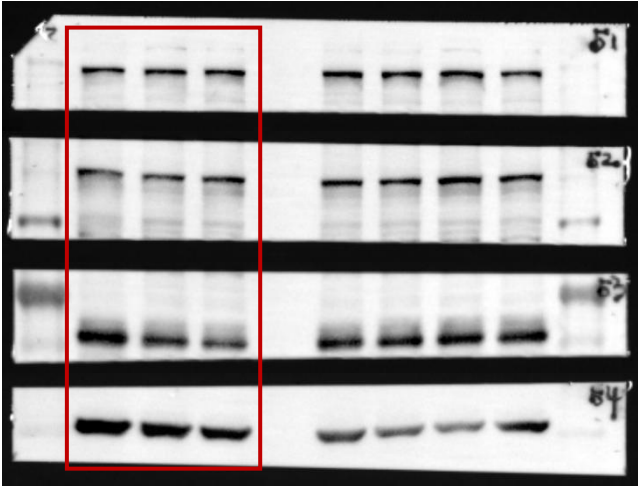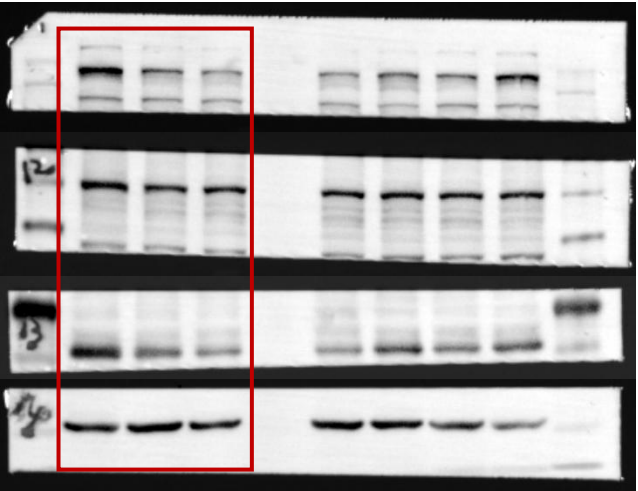

MDA-MB-231

si-NC  
si-XRCCA-1  
si-XRCCA-2

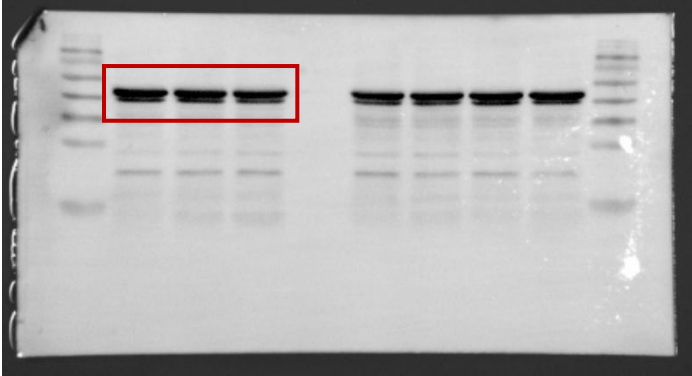

Long exposure

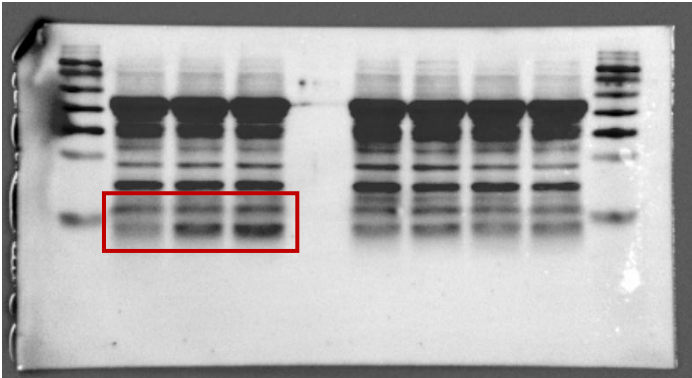



Fig.5G

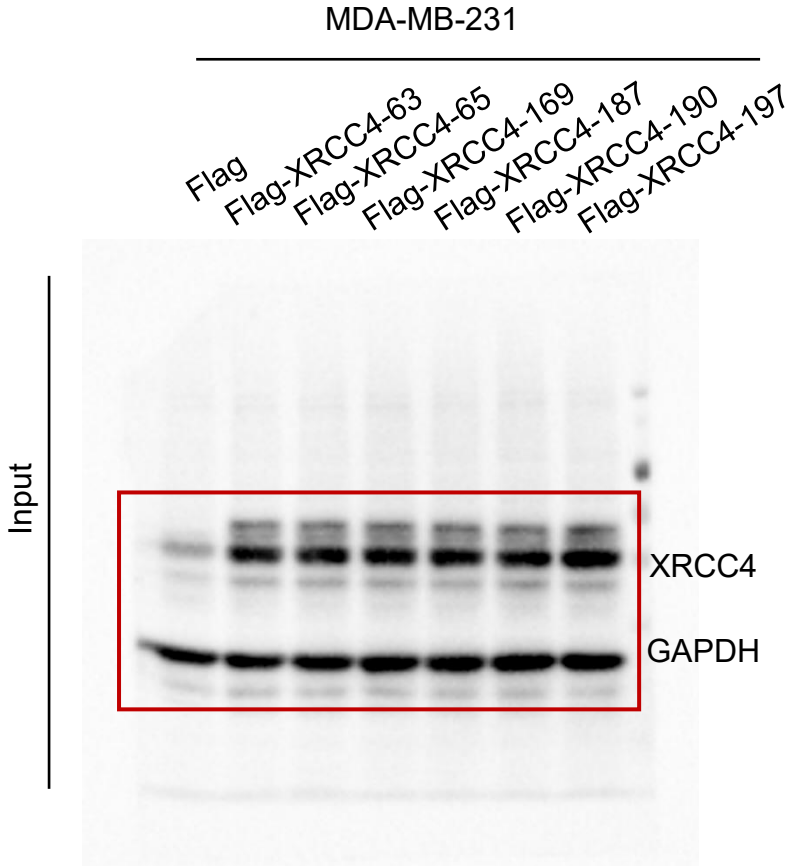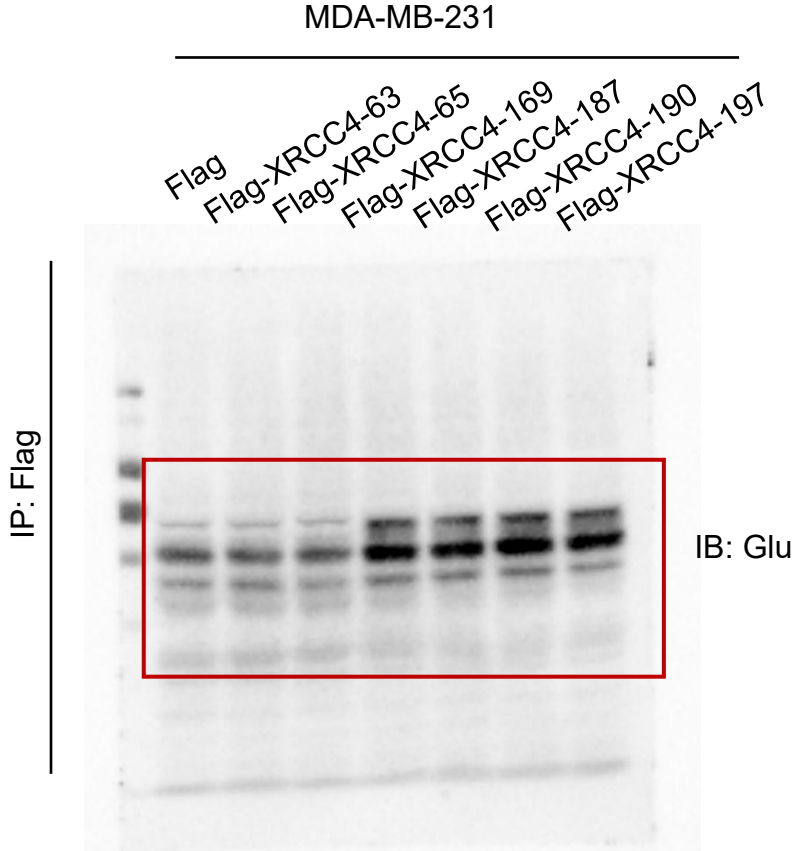

Fig.5H&6I

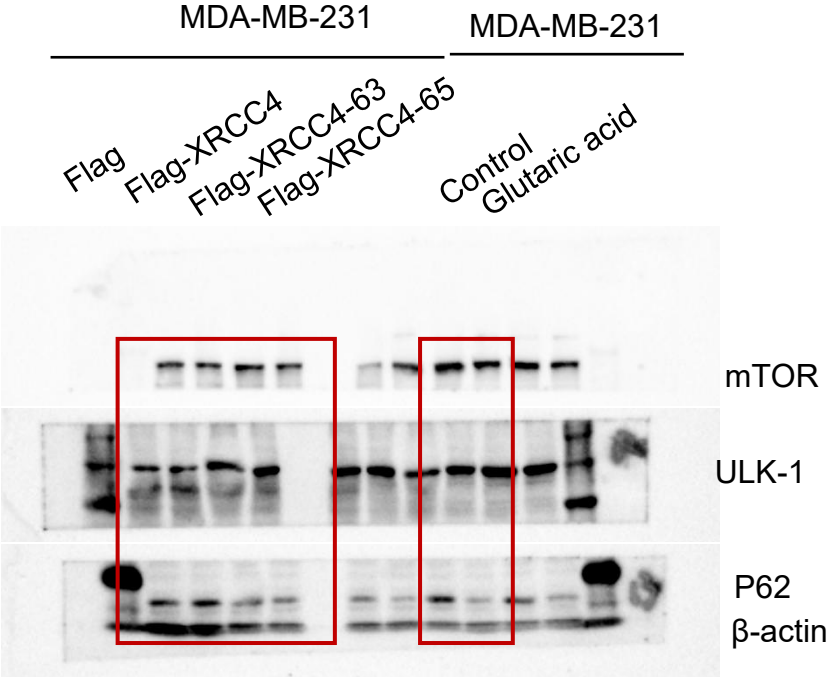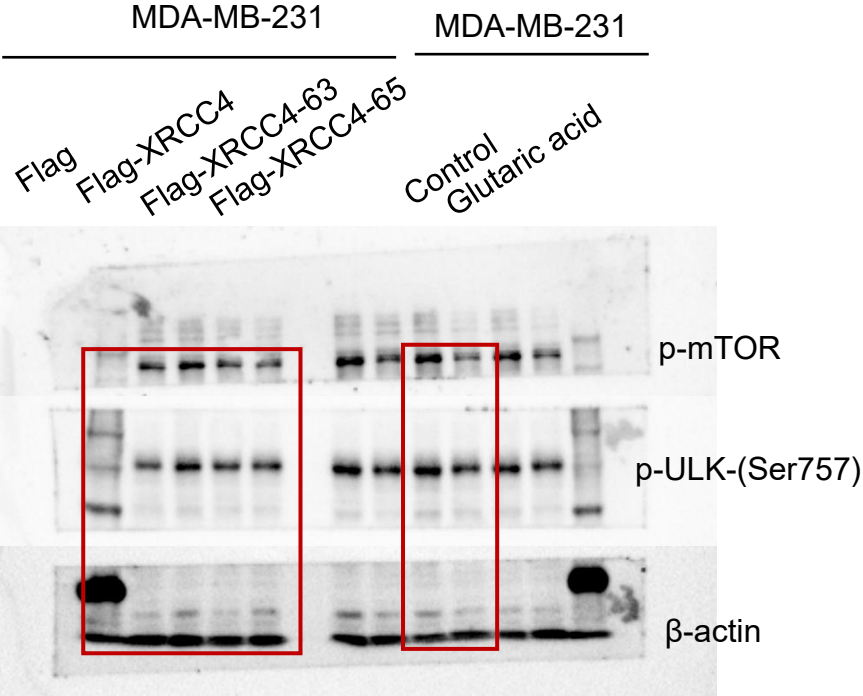

Fig.6F

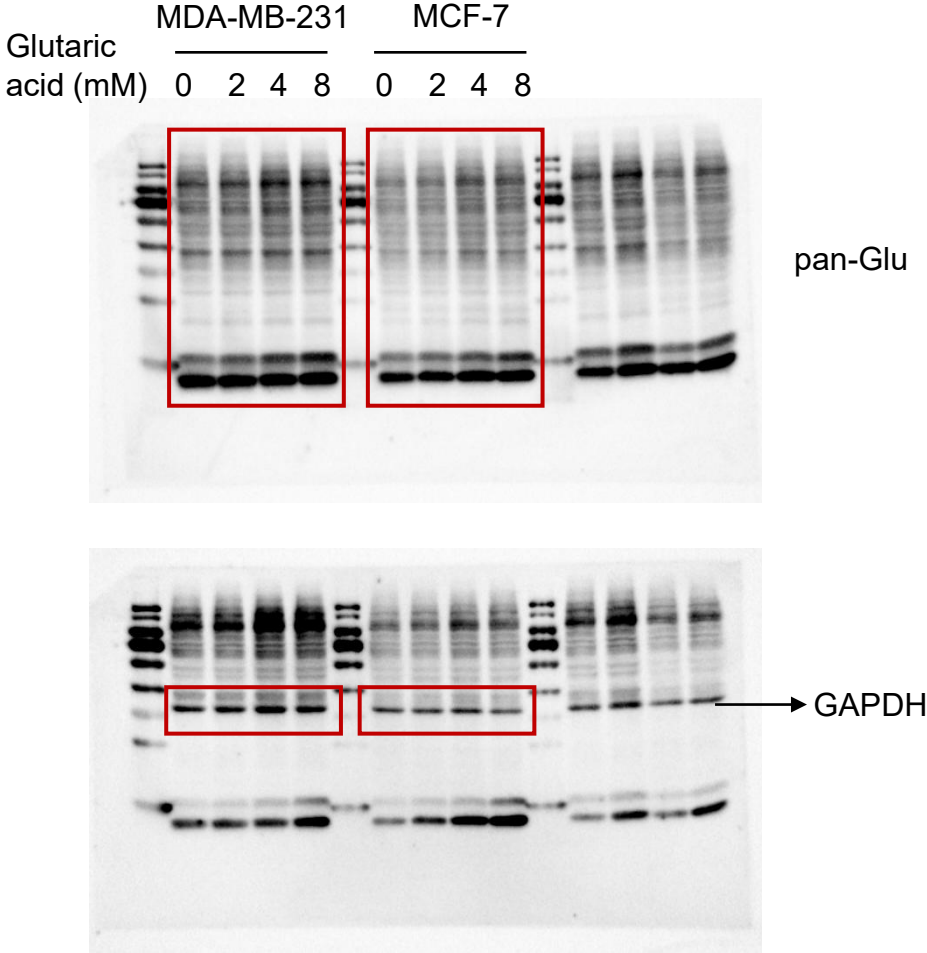

Fig.6G

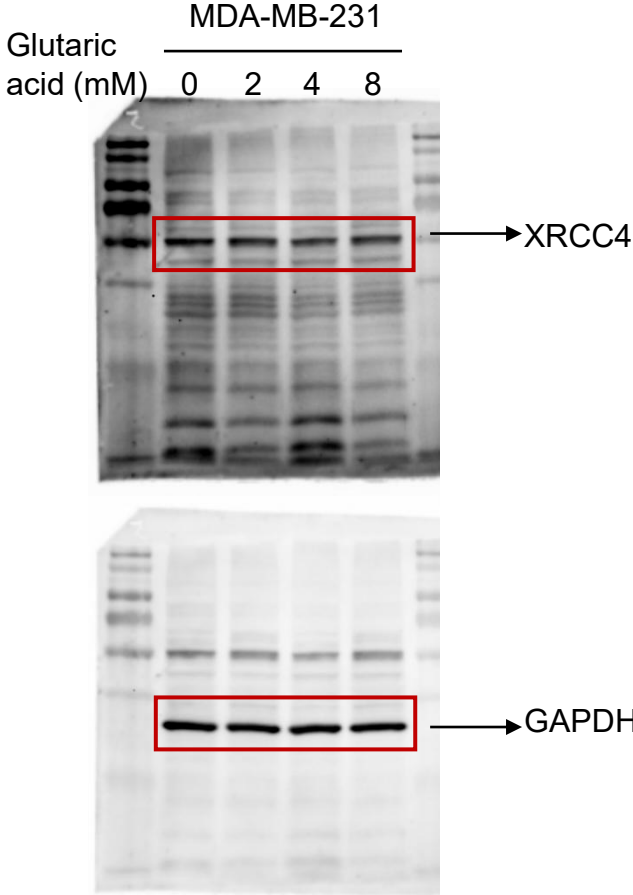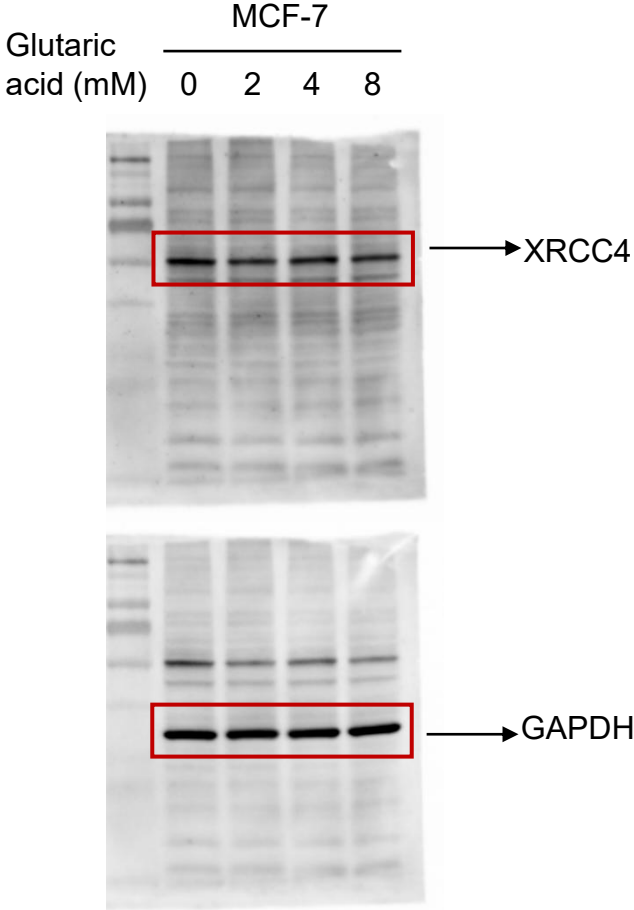



Fig.8C

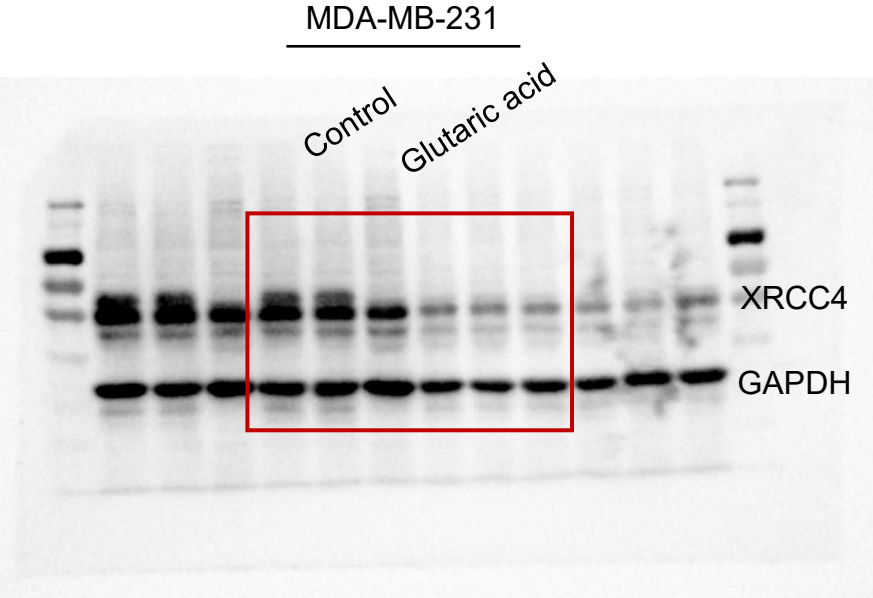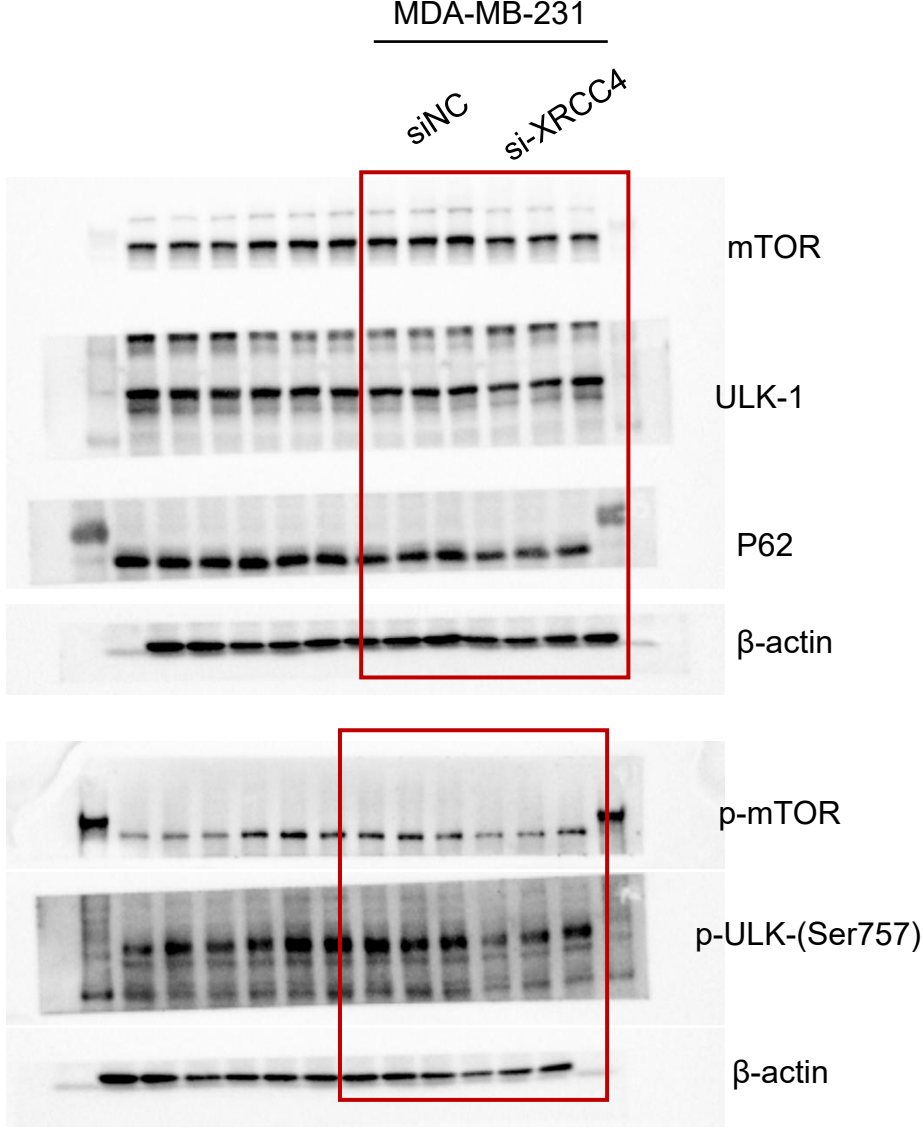

Fig.8F

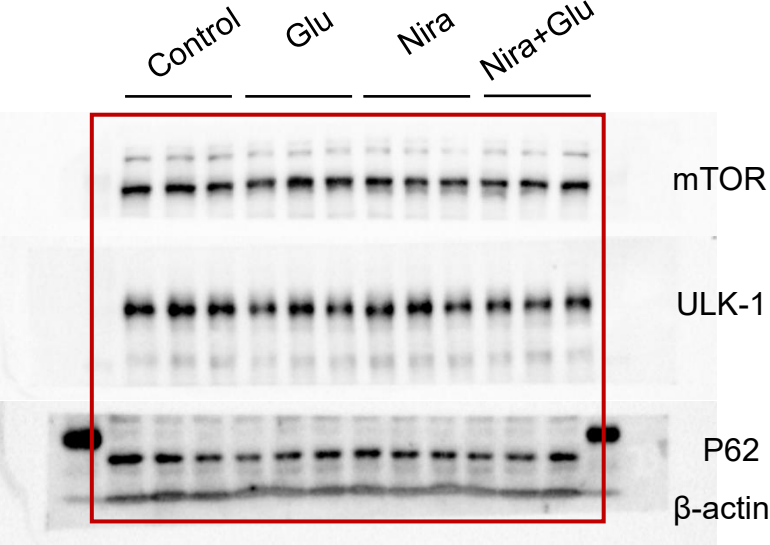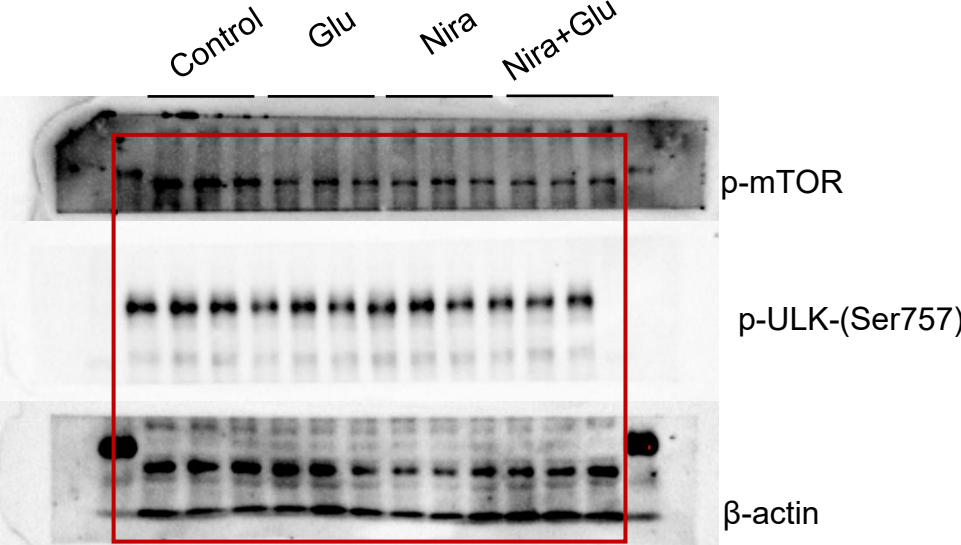

Supplement: Supplementary file 1 [file 2207fb5a57b43a014c6379bd.pdf]
