# Supplementary material
Source: Research Square preprint supplement (doi:10.21203/rs.3.rs-9924119/v1)
Supplement: Supplementary file 2 [file 78262bf5382e2b1628fabc43.docx]

**Supplementary materials**

**Table S1. The sequences of siRNA used in this study**

| **Gene Symbol** | **Sequences（5'-3'）** |
| --- | --- |
| *siXRCC4-01* | CUGAUAUUGCACCAAGUAGAATT |
| *siXRCC4-02* | CCUCAGGAGAAUCAGCUUCAATT |
| *siXRCC4-02* | UGUGUGAGUGCUAAGGAAGCUTT |
| *siSIRT5* | GCUGGAGGUUAUUGGAGAATT |

**Table S2. Kits and reagents used in this study**

| **Kit/Reagent** | **Source** | **Identifier (Cat#)** |
| --- | --- | --- |
| Glutaric acid | Selleck | S3152 |
| Niraparib | Selleck | S2741 |
| Olaparib | Selleck | S1060 |
| Protein A/G Magnetic Beads for IP | Selleck | B23202 |
| MHY1485 | Selleck | S7811 |
| Rapamycin | Selleck | S1039 |
| Cell lysis buffer for Western and IP | Beyotime | P0013 |
| Co-Immunoprecipitation Kit | BersinBio | Bes3011 |
| BeyoClick™ EdU-488 | Beyotime | C0071S |
| Triton X-100 | Beyotime | P0096 |
| Lipofectamine 3000 | Thermo | L3000015 |
| DAPI | Solarbio | S2110 |
| Nuclear and cytoplasmic protein extraction kit | Beyotime | P0028 |

**Table S3. Primers for PCR used in this study**

| **Gene Symbol** | **Gene ID** | **Primer Sequences（5'-3'）** |
| --- | --- | --- |
| *XRCC4* | 7518 | F: ATGTTGGTGAACTGAGAAAAGCA  R: GCAATGGTGTCCAAGCAATAAC |
| *β-actin* | 60 | F: CATGTACGTTGCTATCCAGGC  R: CTCCTTAATGTCACGCACGAT |
| *SIRT5* | 23408 | F: GCCATAGCCGAGTGTGAGAC  R: CAACTCCACAAGAGGTACATCG |

**Table S4. Antibodies used in this study**

| **Antibody** | **Source** | **Identifier** | **Dilution (Application)** |
| --- | --- | --- | --- |
| Anti-Glutaryllysine Rabbit pAb | PTM Bio Inc | Cat#PTM-1151 | 1:1000 (WB) |
| XRCC4 Polyclonal antibody | Proteintech | 15817-1-AP | 1:1000 (WB)  IP:3ug/3mg protein |
| SIRT5 Monoclonal antibody | Proteintech | 67257-1-Ig | 1:5000 (WB) |
| Phospho-Histone H2AX (Ser139) Rabbit Polyclonal Antibody | Byotime | AF5836 | 1:1000 (WB)  1:50 (IF) |
| mTOR Monoclonal antibody | Proteintech | 66888-1-Ig | 1:5000 (WB) |
| Phospho-mTOR (Ser2448) Monoclonal antibody | Proteintech | 67778-1-Ig | 1:2000 (WB) |
| ULK1 Polyclonal antibody | Proteintech | 20986-1-AP | 1:1000 (WB) |
| Phospho-ULK1 (Ser 757) Rabbit mAb | Selleck | F0351 | 1:1000 (WB) |
| P62/SQSTM1 Polyclonal antibody | Proteintech | 18420-1-AP | 1:5000 (WB) |
| Anti-LC3 pAb | MBL | PM036 | 1:1000 (WB) |
| GAPDH Monoclonal antibody | Proteintech | 60004-1-Ig | 1:200000 (WB) |
